# Supplementary material
Source: MDPI journal article supplement (https://www.mdpi.com/2227-9717/5/4/77)
Supplement: s1 [file s1]

# Supplementary Material to: Dynamics of the bacterial community associated with *Phaeodactylum tricornutum* cultures

Fiona Wanjiku Moejes<sup>1</sup>, Ovidiu Popa<sup>2,3,†</sup>, Antonella Succurro<sup>3,4,†\*</sup>, Julie Maguire<sup>1</sup> and Oliver Ebenhöf<sup>2,3\*</sup>

<sup>1</sup> Bantry Marine Research Station, Gearhies, Bantry, Co. Cork, Ireland; fmoejes@bmrs.ie (F.W.M.); jmaguire@bmrs.ie (J.M.)

<sup>2</sup> Institute of Quantitative and Theoretical Biology, Heinrich-Heine University, Universitätsstraße 1, 40225 Düsseldorf, Germany; ovidiu.popa@hhu.de

<sup>3</sup> CEPLAS (Cluster of Excellence on Plant Sciences), Heinrich-Heine University, Universitätsstraße 1, 40225 Düsseldorf, Germany

<sup>4</sup> Botanical Institute, University of Cologne, Zùlpicher Straße 47b, 50674 Cologne, Germany

Correspondence: a.succurro@uni-koeln.de (A.S.); oliver.ebenhoeh@hhu.de (O.E.)

<sup>†</sup> These authors contributed equally to this work

## 1 Experimental setup and data analysis

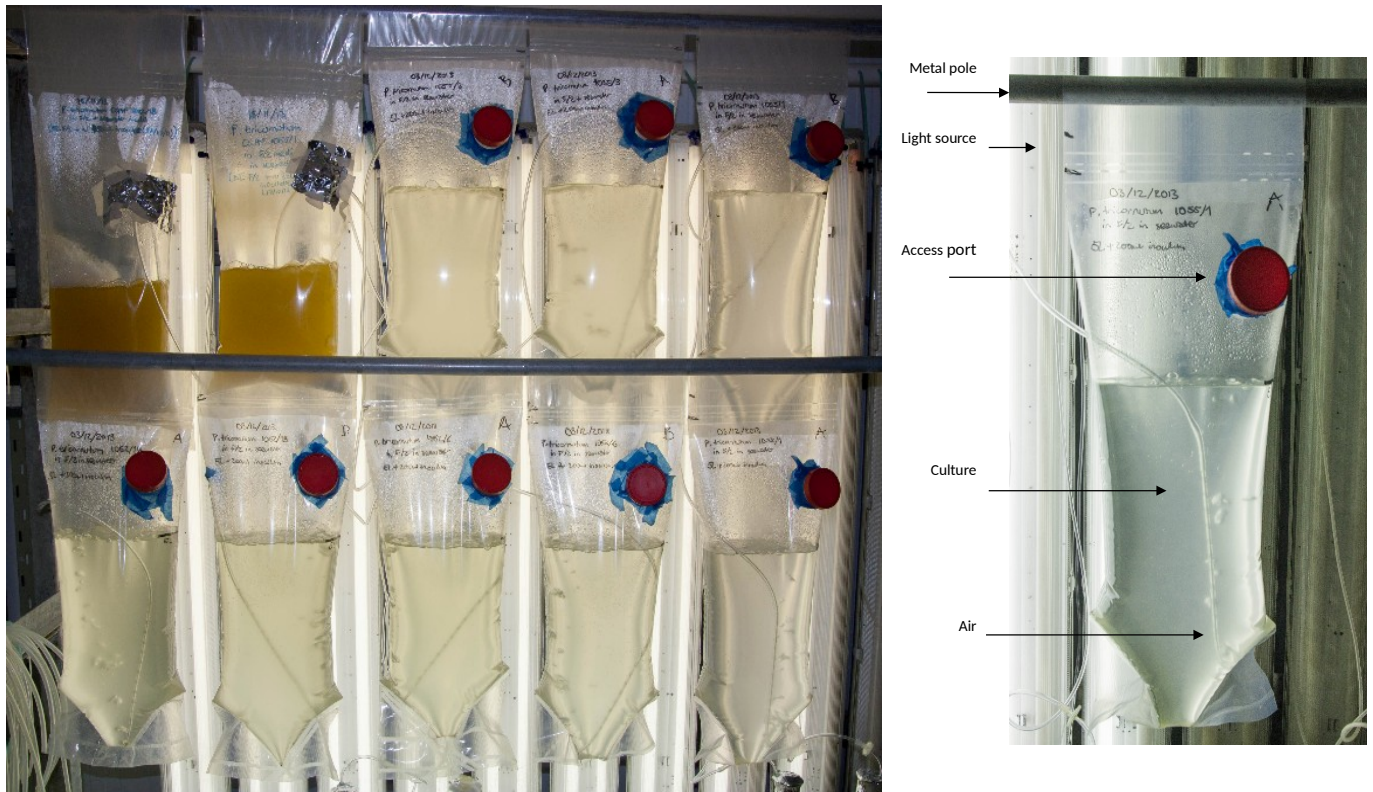

Figure S1: **Non-axenic *Phaeodactylum tricornutum* culture set up.** 5L polyethylene bags with a “V” shaped bottom were created using the heat sealer machine. The bags were then rinsed and filled with 5L of filtered seawater. Afterwards each bag was sealed and hung approximately 30 cm from the light source. A small incision was made to insert the aeration tubing. This consists of a 10ml pipette attached to silicon tubing which is attached to an sterile air filter connecting it to the main air supply. A modified access port was created to take samples and measure the environmental parameters (Photographs courtesy of Maria Rubio Bernal)

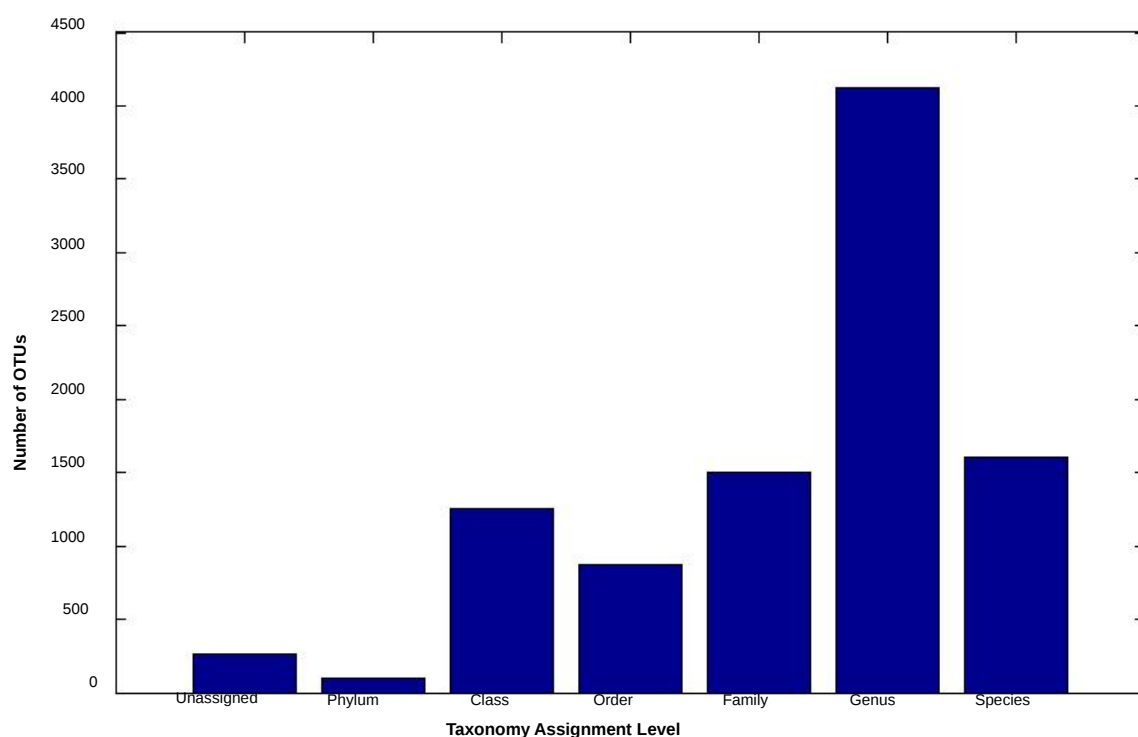

**Figure S2: Operational Taxonomic Unit (OTU) Taxonomy Assignment Level.** The 16S rRNA gene sequences were clustered to defined Operational Taxonomic Units (OTUs) at  $\geq 97\%$  sequence identity. Most OTUs could be assigned to the genera level, using the SILVA database (v.118) [1]

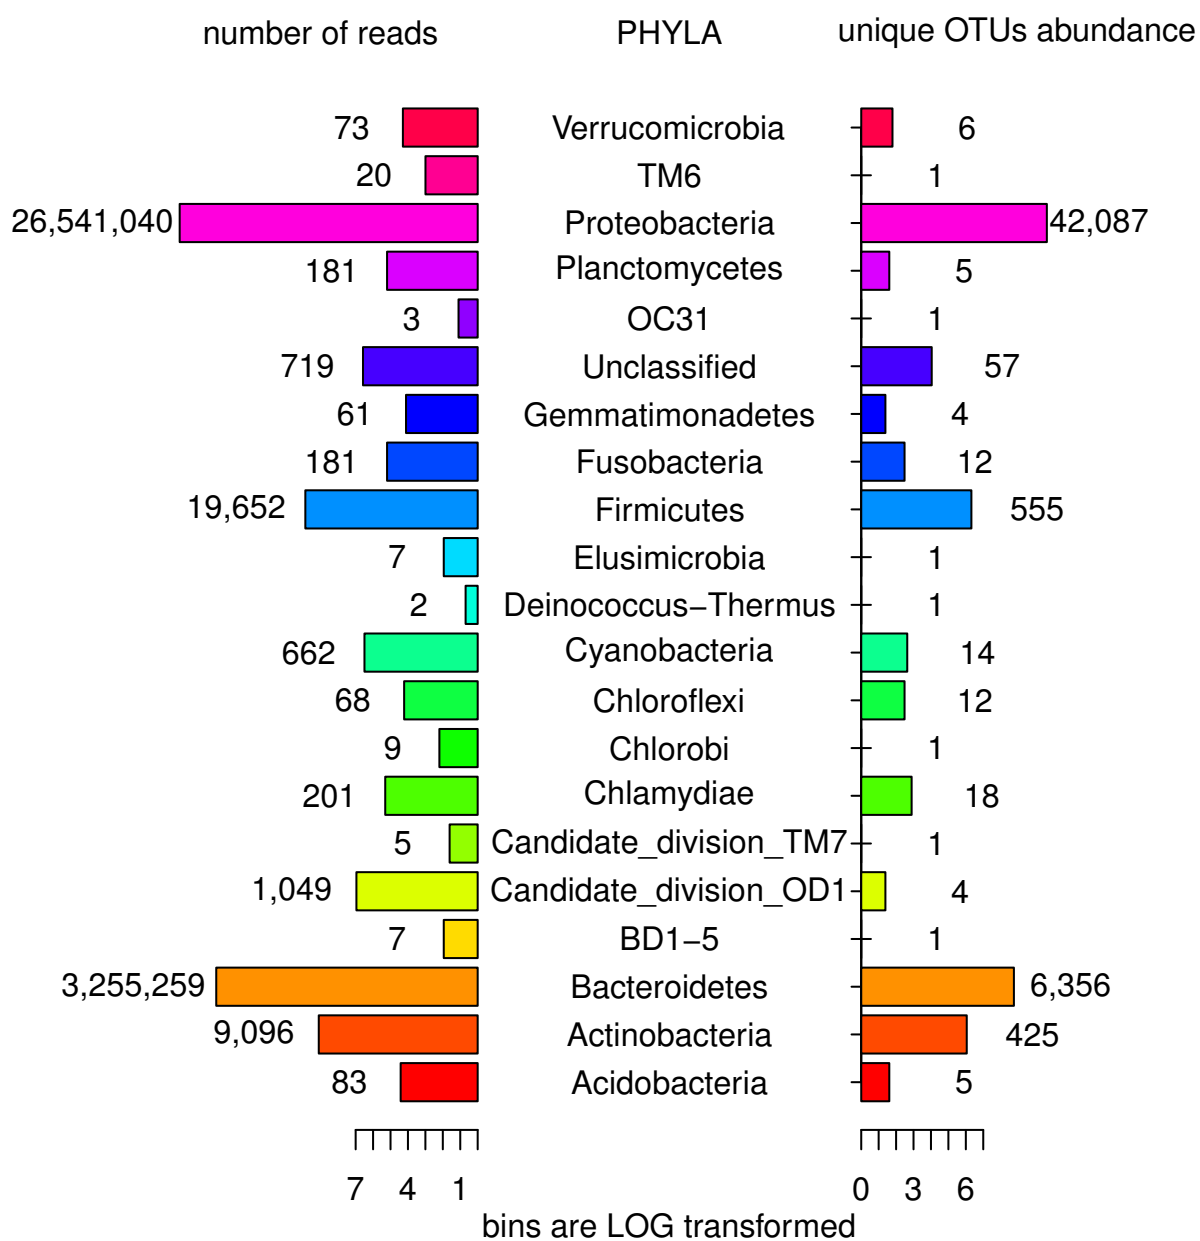

Figure S3: **Number of reads per unique OTU abundance (at the phylum level).** A comparison of the number of individual reads to the number of unique OTUs shows that phyla with high number of reads do not result in single OTUs

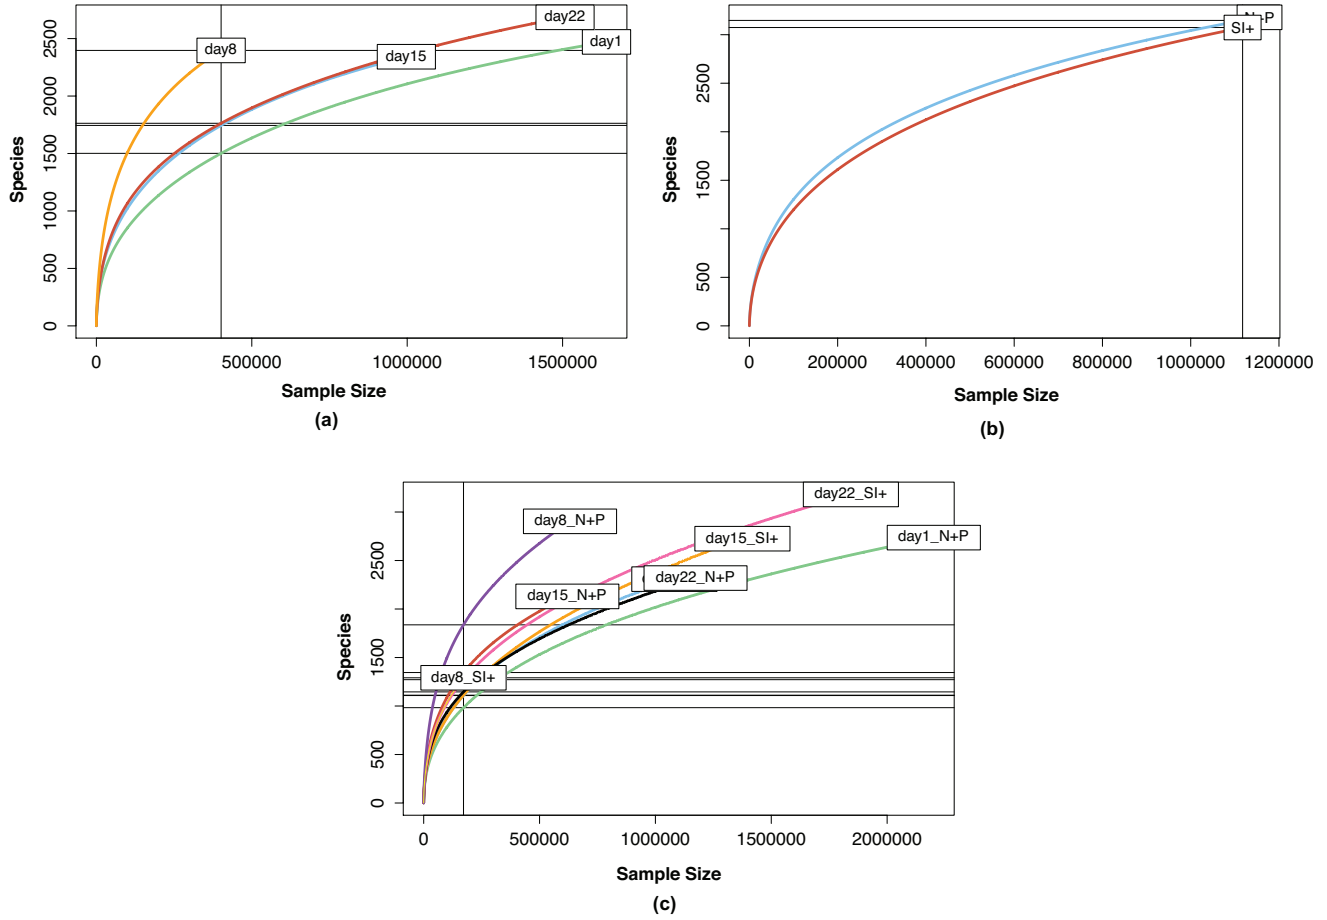

Figure S4: **Alpha diversity**. Rarefaction curves were used to evaluate the Alpha diversity in the different media conditions as well as at the different time points. Species richness in both minimal and complete media was  $\sim 3\,000$ . Species richness over time remained between  $\sim 2\,400$  and  $2\,600$ , with reduced species richness ( $\sim 1\,300$ ) on Day 8 (both minimal and complete media) possibly due to elevated levels of 16S *P. tricornutum* chloroplast reads which had to be omitted. Greatest species richness ( $\sim 3\,000$ ) was shown on Day 22

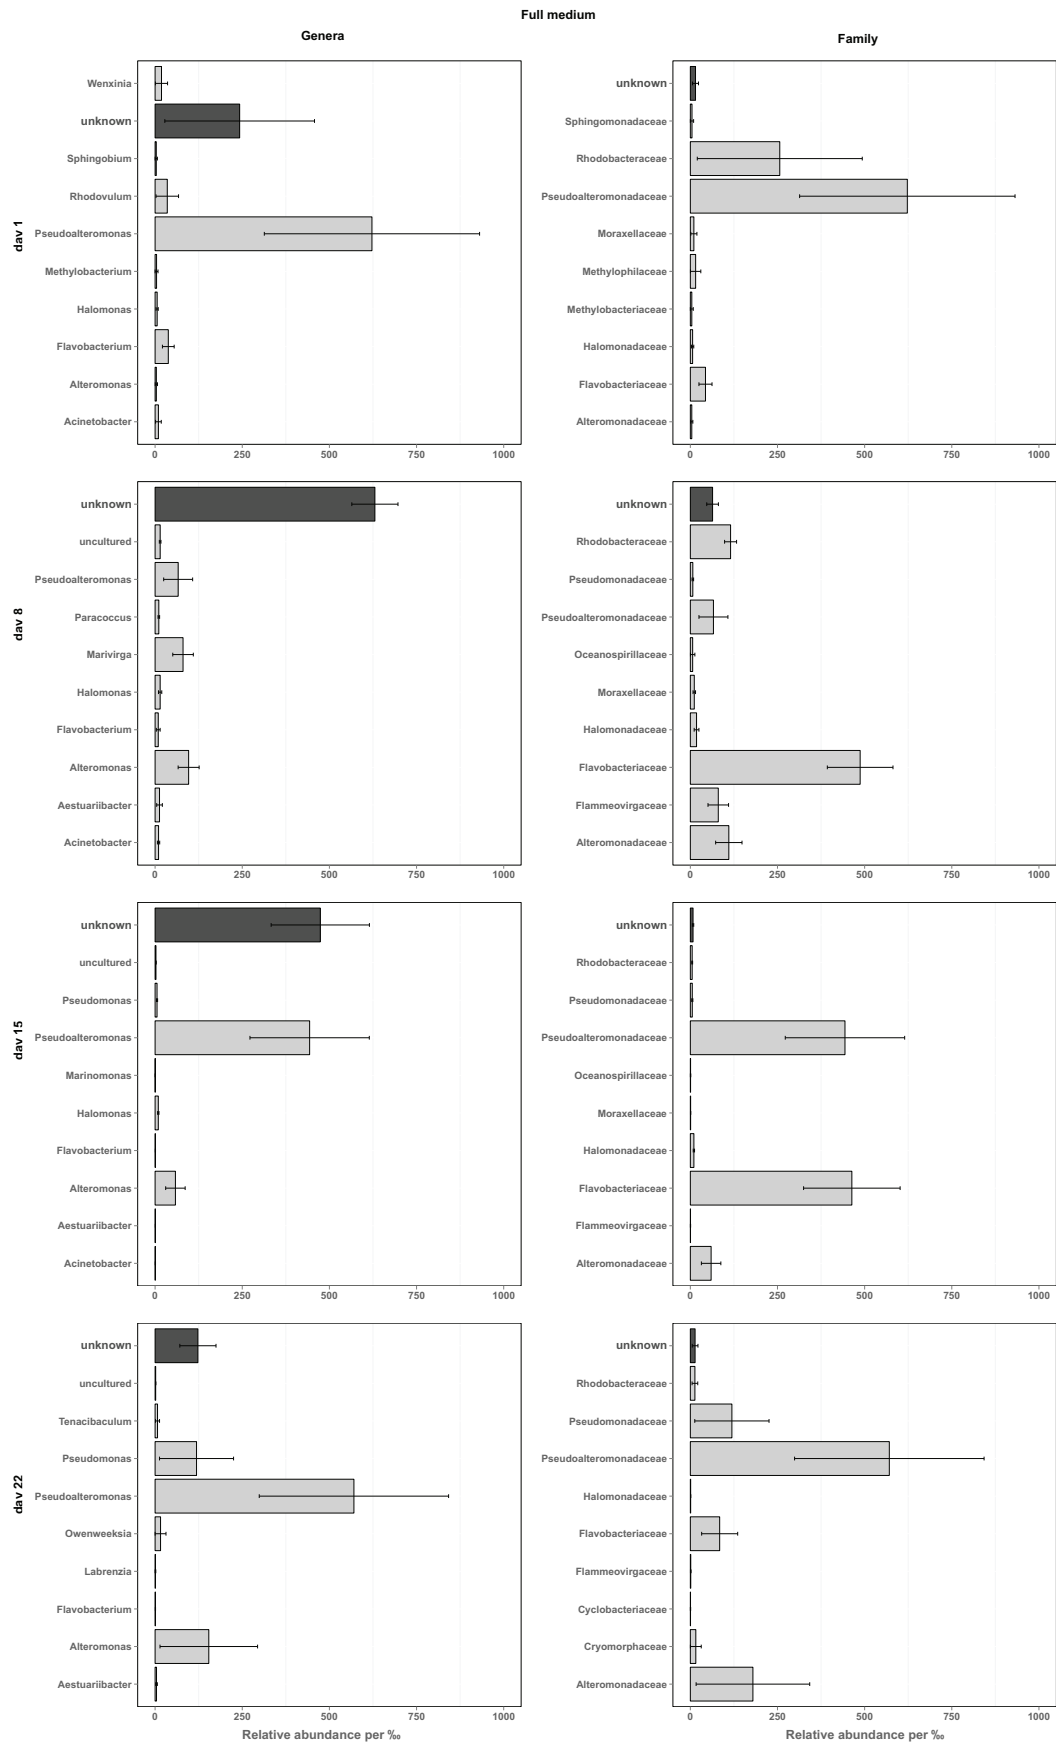

**Figure S5: Comparison between bacterial community at genera level and family level (complete media).** We show no dynamical difference within the genera that cannot be observed at the family level. Encircled in red, there are a greater number of OTUs that could not be assigned a taxonomy ('unknowns') at the genera level than at the family level. By investigating the bacterial community dynamics at the family level, we also include taxonomical information that is unavailable at the genus level

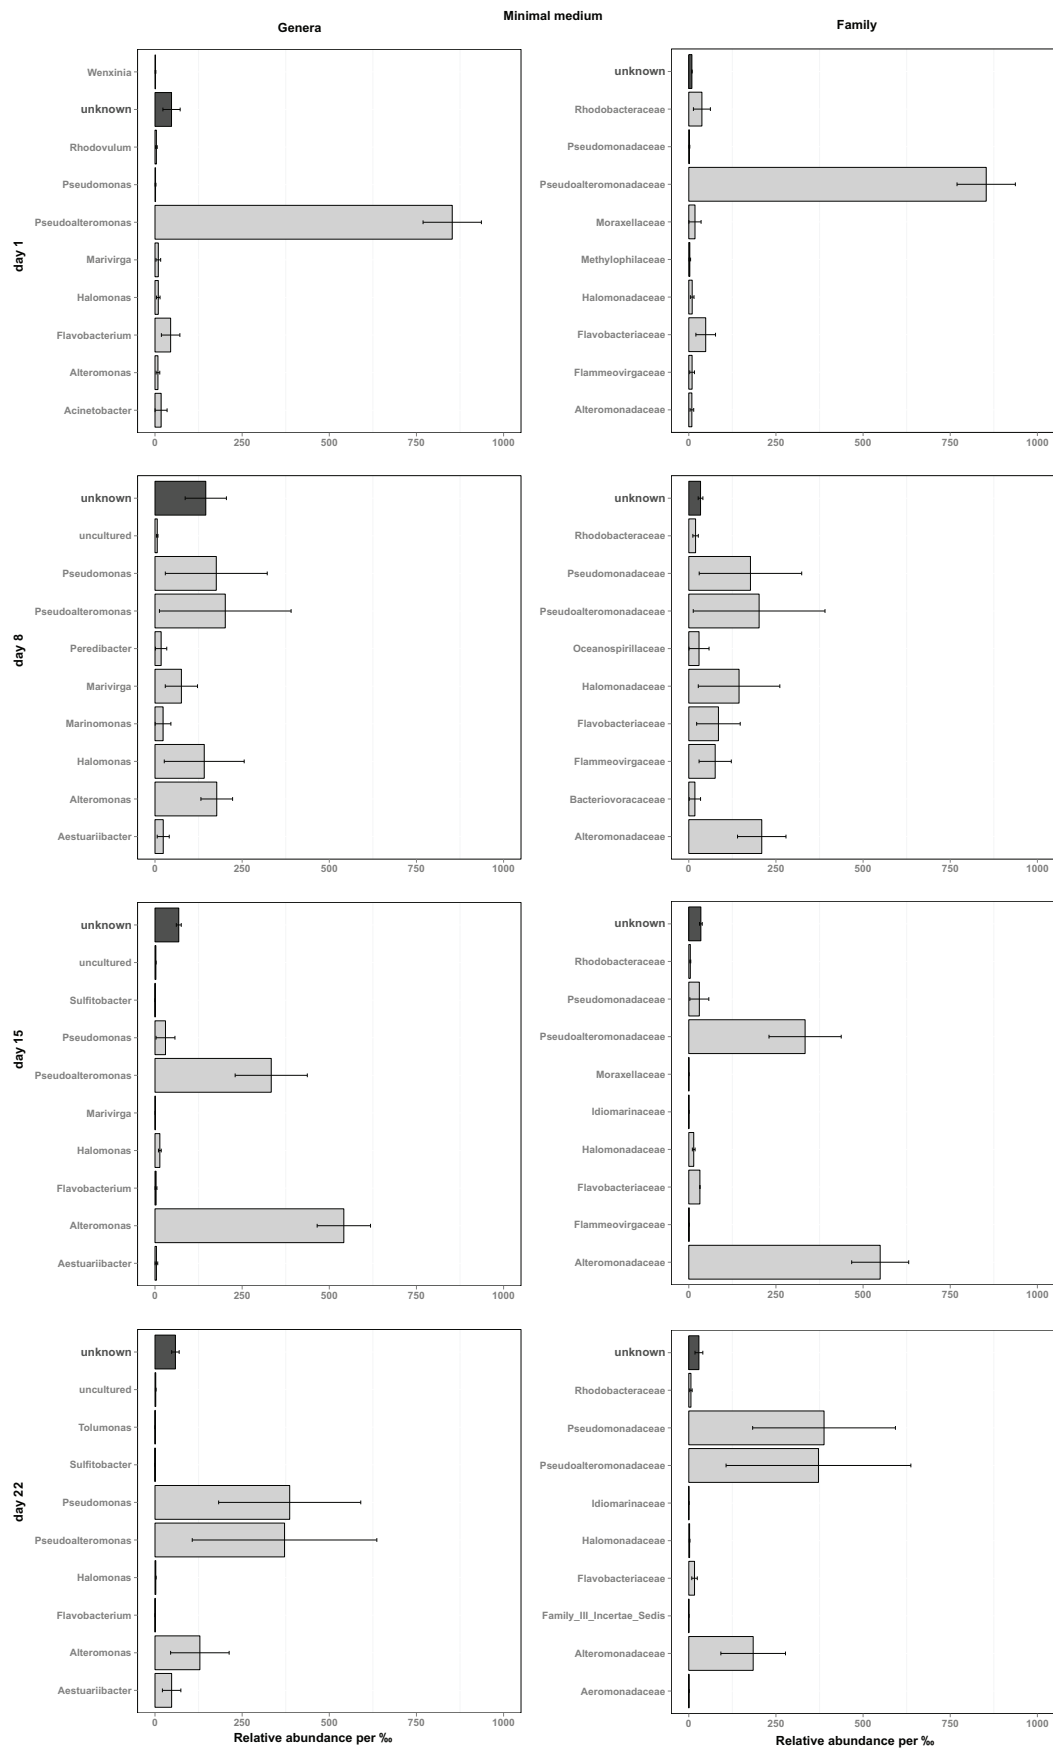

Figure S6: **Comparison between bacterial community at genera level and family level (minimal media).** We show no dynamical difference within the genera that cannot be observed at the family level. Encircled in red, there are a greater number of OTUs that could not be assigned a taxonomy ('unknowns') at the genera level than at the family level. By investigating the bacterial community dynamics at the family level, we also include taxonomical information that is unavailable at the genus level

Table S1: **16S V6 rRNA primer sequences.** ‘Max’ is the complete media. ‘Min’ is the minimal media. ‘A’, ‘B’, and ‘C’ are the three replicates

| Description  | Barcode Name  | Adaptor A Sequence             | Barcode Sequence | Forward V6 Primer Sequence | Reverse V6 Primer Sequence |
|--------------|---------------|--------------------------------|------------------|----------------------------|----------------------------|
| Day 1_Max_A  | IonXpress.071 | CCATCTCATCCCTGCGTGTCTCCGACTCAG | TGAGGCTCCGAC     | MWACGCGARGAACCTTACC        | CGACARCCATGCANCACCT        |
| Day 1_Max_B  | IonXpress.072 | CCATCTCATCCCTGCGTGTCTCCGACTCAG | CGAAGGCCACAC     | MWACGCGARGAACCTTACC        | CGACARCCATGCANCACCT        |
| Day 1_Max_C  | IonXpress.073 | CCATCTCATCCCTGCGTGTCTCCGACTCAG | TCTGCCTGTC       | MWACGCGARGAACCTTACC        | CGACARCCATGCANCACCT        |
| Day 1_Min_A  | IonXpress.074 | CCATCTCATCCCTGCGTGTCTCCGACTCAG | CGATCGGTTC       | MWACGCGARGAACCTTACC        | CGACARCCATGCANCACCT        |
| Day 1_Min_B  | IonXpress.075 | CCATCTCATCCCTGCGTGTCTCCGACTCAG | TCAGGAATAC       | MWACGCGARGAACCTTACC        | CGACARCCATGCANCACCT        |
| Day 1_Min_C  | IonXpress.076 | CCATCTCATCCCTGCGTGTCTCCGACTCAG | CGGAAGAACCTC     | MWACGCGARGAACCTTACC        | CGACARCCATGCANCACCT        |
| Day 8_Max_A  | IonXpress.077 | CCATCTCATCCCTGCGTGTCTCCGACTCAG | CGAAGCGATTTC     | MWACGCGARGAACCTTACC        | CGACARCCATGCANCACCT        |
| Day 8_Max_B  | IonXpress.078 | CCATCTCATCCCTGCGTGTCTCCGACTCAG | CAGCCAATTCTC     | MWACGCGARGAACCTTACC        | CGACARCCATGCANCACCT        |
| Day 8_Max_C  | IonXpress.079 | CCATCTCATCCCTGCGTGTCTCCGACTCAG | CCTGGTTGTC       | MWACGCGARGAACCTTACC        | CGACARCCATGCANCACCT        |
| Day 8_Min_A  | IonXpress.080 | CCATCTCATCCCTGCGTGTCTCCGACTCAG | TCGAAGGCAGGC     | MWACGCGARGAACCTTACC        | CGACARCCATGCANCACCT        |
| Day 8_Min_B  | IonXpress.081 | CCATCTCATCCCTGCGTGTCTCCGACTCAG | CCTGCCATTTCG     | MWACGCGARGAACCTTACC        | CGACARCCATGCANCACCT        |
| Day 8_Min_C  | IonXpress.082 | CCATCTCATCCCTGCGTGTCTCCGACTCAG | TTGGCATCTC       | MWACGCGARGAACCTTACC        | CGACARCCATGCANCACCT        |
| Day 15_Max_A | IonXpress.083 | CCATCTCATCCCTGCGTGTCTCCGACTCAG | CTAGGACATTTC     | MWACGCGARGAACCTTACC        | CGACARCCATGCANCACCT        |
| Day 15_Max_B | IonXpress.084 | CCATCTCATCCCTGCGTGTCTCCGACTCAG | CTTCCATAAC       | MWACGCGARGAACCTTACC        | CGACARCCATGCANCACCT        |
| Day 15_Max_C | IonXpress.085 | CCATCTCATCCCTGCGTGTCTCCGACTCAG | CCAGCCTCAAC      | MWACGCGARGAACCTTACC        | CGACARCCATGCANCACCT        |
| Day 15_Min_A | IonXpress.086 | CCATCTCATCCCTGCGTGTCTCCGACTCAG | CTTGGTTATTC      | MWACGCGARGAACCTTACC        | CGACARCCATGCANCACCT        |
| Day 15_Min_B | IonXpress.087 | CCATCTCATCCCTGCGTGTCTCCGACTCAG | TTGGCTGGAC       | MWACGCGARGAACCTTACC        | CGACARCCATGCANCACCT        |
| Day 15_Min_C | IonXpress.088 | CCATCTCATCCCTGCGTGTCTCCGACTCAG | CCGAACACTTC      | MWACGCGARGAACCTTACC        | CGACARCCATGCANCACCT        |
| Day 22_Max_A | IonXpress.090 | CCATCTCATCCCTGCGTGTCTCCGACTCAG | CTAACCACGGC      | MWACGCGARGAACCTTACC        | CGACARCCATGCANCACCT        |
| Day 22_Max_B | IonXpress.091 | CCATCTCATCCCTGCGTGTCTCCGACTCAG | CGGAAGGATGC      | MWACGCGARGAACCTTACC        | CGACARCCATGCANCACCT        |
| Day 22_Max_C | IonXpress.092 | CCATCTCATCCCTGCGTGTCTCCGACTCAG | CTAGGAACCGC      | MWACGCGARGAACCTTACC        | CGACARCCATGCANCACCT        |
| Day 22_Min_A | IonXpress.093 | CCATCTCATCCCTGCGTGTCTCCGACTCAG | CTTGTCCAATC      | MWACGCGARGAACCTTACC        | CGACARCCATGCANCACCT        |
| Day 22_Min_B | IonXpress.094 | CCATCTCATCCCTGCGTGTCTCCGACTCAG | TCCGACAAGC       | MWACGCGARGAACCTTACC        | CGACARCCATGCANCACCT        |
| Day 22_Min_C | IonXpress.095 | CCATCTCATCCCTGCGTGTCTCCGACTCAG | CGGACAGATC       | MWACGCGARGAACCTTACC        | CGACARCCATGCANCACCT        |

Table S2: **Generalized UniFrac distances of bacterial communities in complete and minimal media over time.** Generalized UniFrac distance contains an extra parameter  $\alpha$  controlling the weight on abundant lineages so the distance is not dominated by highly abundant lineages.  $\alpha = 0.5$  has overall the best power

|        |          | DAY 1     |           | DAY 8     |           | DAY 15    |           | DAY 22    |           |
|--------|----------|-----------|-----------|-----------|-----------|-----------|-----------|-----------|-----------|
|        |          | Minimal   | Complete  | Minimal   | Complete  | Minimal   | Complete  | Minimal   | Complete  |
| DAY 1  | Minimal  | 0         | 0.5158104 | 0.7195151 | 0.8637909 | 0.6668939 | 0.7504169 | 0.6655156 | 0.6608732 |
|        | Complete | 0.5158104 | 0         | 0.7020723 | 0.7203046 | 0.7176411 | 0.7125498 | 0.7019796 | 0.6733559 |
| DAY 8  | Minimal  | 0.7195151 | 0.7020723 | 0         | 0.6641379 | 0.5844515 | 0.6637369 | 0.5905962 | 0.497263  |
|        | Complete | 0.8637909 | 0.7203046 | 0.6641379 | 0         | 0.8558383 | 0.5896856 | 0.8340209 | 0.7723285 |
| DAY 15 | Minimal  | 0.6668939 | 0.7176411 | 0.5844515 | 0.8558383 | 0         | 0.6605545 | 0.4569922 | 0.5042935 |
|        | Complete | 0.7504169 | 0.7125498 | 0.6637369 | 0.5896856 | 0.6605545 | 0         | 0.630498  | 0.5720828 |
| DAY 22 | Minimal  | 0.6655156 | 0.7019796 | 0.5905962 | 0.8340209 | 0.4569922 | 0.630498  | 0         | 0.4597439 |
|        | Complete | 0.6608732 | 0.6733559 | 0.497263  | 0.7723285 | 0.5042935 | 0.5720828 | 0.4597439 | 0         |

## References

- [1] C. Quast, E. Pruesse, P. Yilmaz, J. Gerken, T. Schweer, P. Yarza, J. Peplies, and F. O. Glockner. The SILVA ribosomal RNA gene database project: improved data processing and web-based tools. *Nucleic Acids Research*, 41(D1):D590–D596, 2013.
